# Supplementary material for: Low Exposures to Amphibole or Serpentine Asbestos in Germline Bap1-mutant Mice Induce Mesothelioma Characterized by an Immunosuppressive Tumor Microenvironment
Source: PubMed Central journal article supplement (PMC11000687; doi:10.1158/2767-9764.crc-23-0423), 2024-04-08
Supplement: crc-23-0423-s01.pdf [file crc-23-0423-s01.pdf]

**Supplementary Table S1.** Primary antibodies used for IHC, IF, and immunoblot analyses

| Primary Antibodies  | RRID        | Dilution | Company                  | Clone/Cat. No.                                    |
|---------------------|-------------|----------|--------------------------|---------------------------------------------------|
| anti-Arginase-1     | AB_2800207  | 1:300    | Cell Signaling           | D4E3M, rabbit mAb #93668                          |
| anti-Bap1           | AB_2798168  | 1:2000   | Cell Signaling           | D7W7O, rabbit mAb #13271                          |
| anti-CCR2 antibody  | AB_2893307  | 1:100    | Abcam                    | EPR2084415, rabbit mAb #ab273050                  |
| anti-CD3 $\epsilon$ | AB_2755035  | 1:50     | Cell Signaling           | D4V8L, rabbit mAb #99940                          |
| anti-CD11c          | AB_2924836  | 1:100    | Cell Signaling           | D1V9Y, rabbit mAb #39143                          |
| anti-CD39           | AB_2889212  | 1:1000   | Abcam                    | EPR20627, rabbit mAb #ab223842                    |
| anti-CD45R/B220     | AB_394616   | 1:100    | BD Biosciences           | Clone RA3-6B2, Biotin Conjugated, rat mAb #553086 |
| anti-CD163          | AB_2753196  | 1:200    | Abcam                    | EPR19518, rabbit mAb #ab182422                    |
| anti-CD206          | AB_2892682  | 1:600    | Cell Signaling           | E6T5J, rabbit mAb #24595                          |
| anti-F4/80          | AB_2799771  | 1:800    | Cell Signaling           | D2S9R, rabbit mAb #70076                          |
| anti-iNOS           | AB_3083470  | 1:50     | Abcam                    | RM1017, rabbit mAb #ab283655                      |
| anti-Nf2            | AB_2798056  | 1:4000   | Cell Signaling           | D6N8H, rabbit mAb #12896                          |
| anti-NK1.1          | AB_2296673  | 1:50     | Thermo Fisher Scientific | PK136, mouse mAb #MA1-70100                       |
| anti-p16Ink4a       | AB_2891084  | 1:2000   | Abcam                    | EPR20418, rabbit mAb #ab211542                    |
| anti-Podoplanin     | AB_298718   | 1:100    | Abcam                    | RTD4E10, Syrian hamster mAb #ab11936              |
| anti-SMA            | AB_3065058  | 1:100    | BioGenex                 | HHF35, mouse mAb #AM090-GP                        |
| anti-Vinculin       | AB_2728768  | 1:50,000 | Cell Signaling           | E1E9V, rabbit mAb #13901                          |
| anti-WT1            | AB_2043201  | 1:30     | Abcam                    | CAN-R9 (IHC)-56-2, rabbit mAb #ab89901            |
| anti-MCP1 (CCL2)    | AB_3083804  | 1:1000   | Abcam                    | EPR21025, rabbit mAb #ab214819                    |
| Anti-GAPDH          | AB_10622025 | 1:50000  | Cell Signaling           | D16H11 XP, rabbit mAb #5174                       |
