# Supplementary material for: Low Exposures to Amphibole or Serpentine Asbestos in Germline Bap1-mutant Mice Induce Mesothelioma Characterized by an Immunosuppressive Tumor Microenvironment
Source: PubMed Central journal article supplement (PMC11000687; doi:10.1158/2767-9764.crc-23-0423), 2024-04-08
Supplement: crc-23-0423-s02.pdf [file crc-23-0423-s02.pdf]

**Supplementary Table S2.** Summary of the ratio of asbestos-exposed mice in each cohort that developed liver fibrosis and/or other abdominal adhesions<sup>1</sup>

| Genotype                   | Crocidolite | Chrysotile          |                     |
|----------------------------|-------------|---------------------|---------------------|
|                            |             | Total dose = 3.2 mg | Total dose = 0.4 mg |
| <i>Bap1</i> <sup>+/-</sup> | 13/20 (65%) | 22/26 (85%)         | 10/18 (56%)         |
| <i>Bap1</i> <sup>+/+</sup> | 13/22 (59%) | 20/23 (87%)         | 9/15 (60%)          |

<sup>1</sup>Many of the mice with fibrosis and/or other abdominal lesions also had peritoneal malignant mesothelioma (MM).
